# Supplementary material
Source: PubMed Central journal article supplement (PMC2562200)
Supplement: supp_1.2-3.131_TableS1.pdf [file supp_1.2-3.131_TableS1.pdf]

**Table S1.** *Smed-PTEN* phenotype manifestation in intact and regenerating worms

| Condition    | Phenotype manifestation <sup>*</sup><br>days after first injection | Phenotype manifestation <sup>*</sup><br>days of regeneration |
|--------------|--------------------------------------------------------------------|--------------------------------------------------------------|
| Intact       | 10.9 ± 2.2                                                         | N/A                                                          |
| Regeneration | 10 ± 0.8                                                           | 2 ± 0.8                                                      |

\*Represent mean of > four different experiments ± s.d. in which signs of phenotype were macroscopically evident. Total animals evaluated for intact (n>100) and regenerating fragments (n=47). Phenotype manifestation (days) for intact and regenerating fragments p= 0.25, Student's *t*-test. Note: In both conditions intact and regeneration 100% of all worms manifested the phenotype and died.
